# Supplementary material for: A new pipeline for pathophysiological analysis of the mammary gland based on organoid transplantation and organ clearing
Source: Oxford University Press journal article supplement (doi:10.1242/jcs.242495), 2020-05-28
Supplement: jcs242495supp.pdf [file jcs242495supp.pdf]

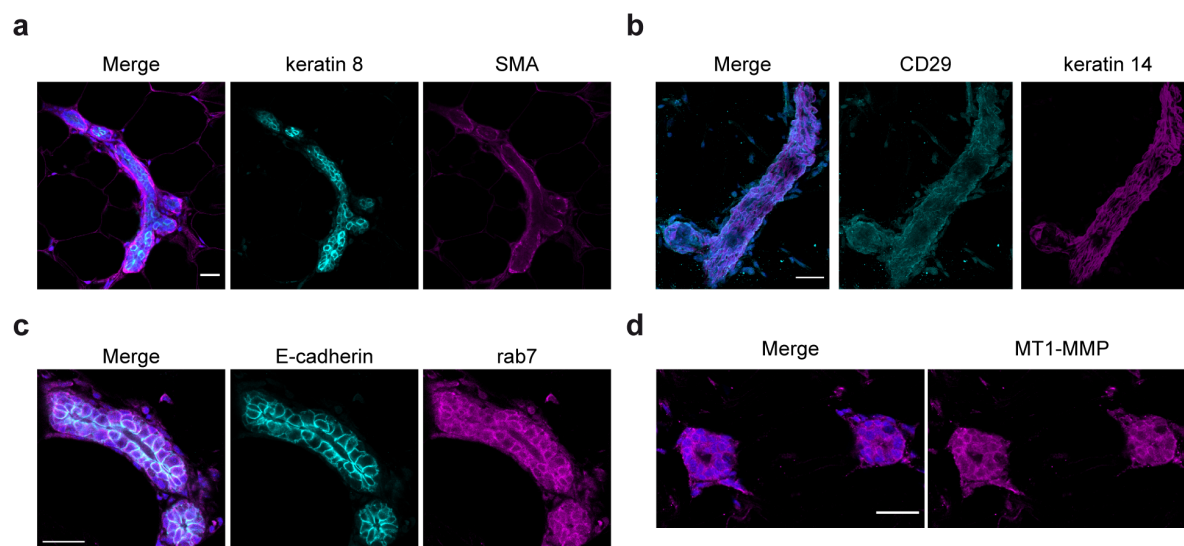

**Figure S1. Examples of immunostaining of mouse mammary gland clearing using uDISCO.** (a) Confocal image of mouse mammary glands stained with anti-Smooth Muscle Actin (SMA) (magenta) and anti-keratin 8 (cyan) antibodies, respectively. (b) z-projection of 10 confocal planes with 2 μm interval (20 μm total thickness) of mouse mammary glands stained with anti-keratin14 (magenta) and anti-CD29 (cyan) antibodies, respectively. (c) Confocal image of mouse mammary glands stained with anti-rab7 (magenta) and anti-E-cadherin (cyan) antibodies, respectively. (d) Confocal image of mouse mammary glands stained with anti-MT1-MMP antibody. Scale bars, 20 μm.

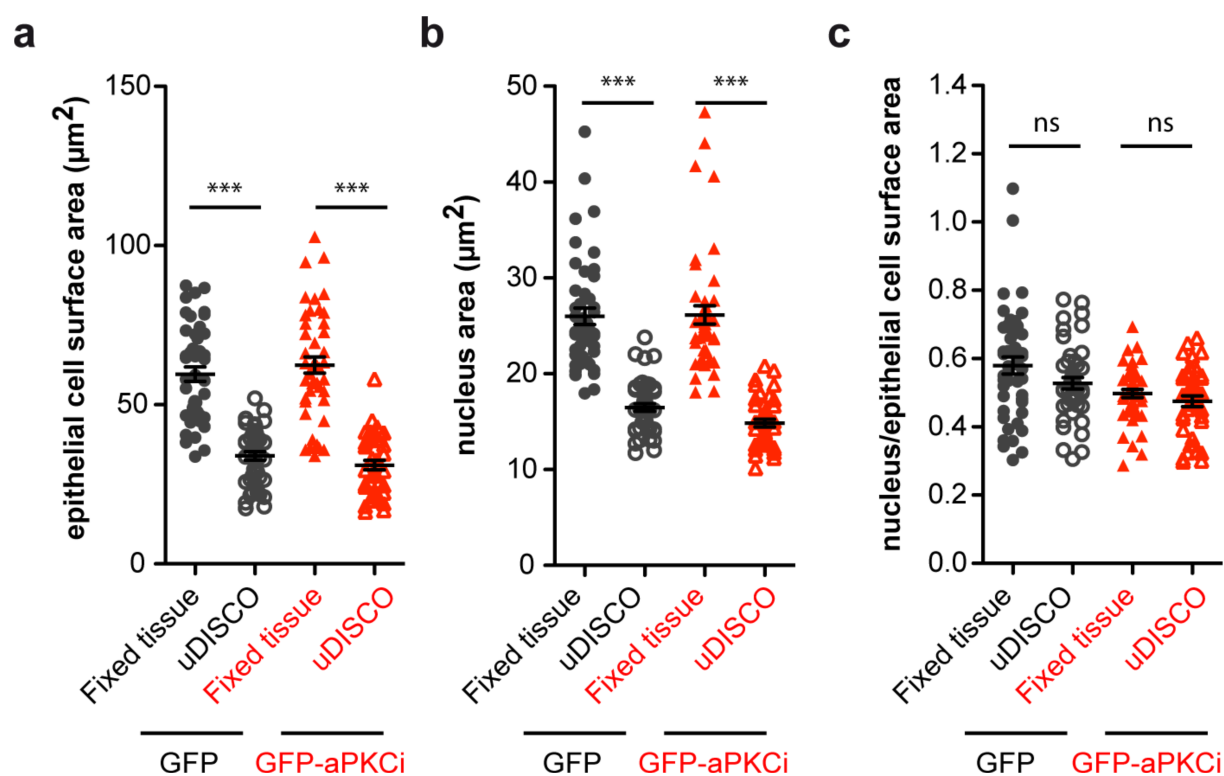

**Figure S2. Quantification of epithelial cell surface and nucleus area of fixed tissue (fixed tissue) or fixed tissue followed by uDISCO treatment (uDISCO) from regenerated mammary glands from GFP<sup>+</sup> or GFP-aPKCi<sup>+</sup> organoids.** (a) Quantification of epithelial cell surface area. The epithelial cell surface and the nucleus area were manually measured in the cell medium confocal plane, respectively using an E-cadherin and a DAPI staining. A Kruskal-Wallis test was performed (\*\*\*)  $p < 0.001$ . (b) Quantification of epithelial nucleus surface area, a Kruskal-Wallis test was performed (\*\*\*)  $p < 0.001$ . (c) Quantification of the ratio between epithelial nucleus surface area and the epithelial cell surface area. A Kruskal-Wallis test was performed (ns, nonsignificant). (a-c) For "GFP-fixed tissue", "GFP-uDISCO", "GFP-aPKCi-fixed tissue" conditions, 45 cells from 3 independent experiments were quantified. For "GFP-aPKCi-uDISCO" condition, 41 cells from 3 independent experiments were quantified.

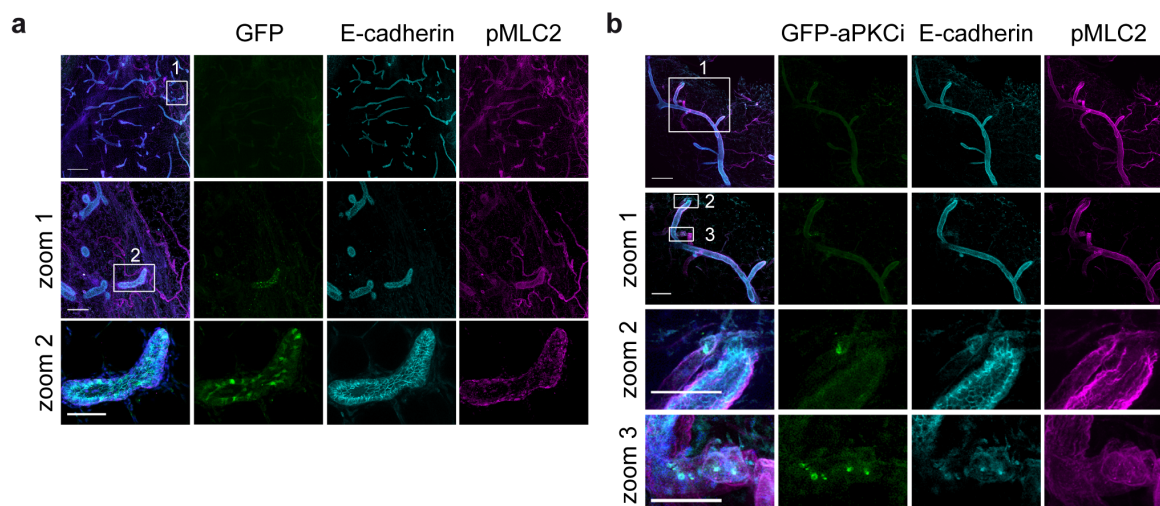

**Figure S3. Combination of Organ clearing and mouse mammary organoids transplantation allows the detection of aPKCi<sup>+</sup> luminal epithelial cells breaching the myoepithelial cell layer and disseminating into the mammary stroma.** Six weeks post transplantation regenerated mammary glands were stained with anti-pMLC2 (magenta) and anti-E-cadherin (cyan) antibodies, respectively. The pMLC2 staining allows the detection of the myoepithelial cell layer and the blood vessel. The E-cadherin staining allows the detection of the mammary luminal epithelial cells. (a) Upper line panels: z-projection of mosaic reconstruction of 102 confocal planes (204  $\mu\text{m}$  thickness) of regenerated mammary glands from GFP<sup>+</sup> infected mouse organoids. Scale bar, 500  $\mu\text{m}$ . Zoom 1: z-projection of 70 confocal planes (140  $\mu\text{m}$  thickness). Scale bar, 100  $\mu\text{m}$ . Zoom 2: z-projection of 7 confocal planes (14  $\mu\text{m}$  thickness). Scale bar, 50  $\mu\text{m}$ . (b) Upper line panels and zoom1: z-projection of mosaic reconstruction of 97 confocal planes (194  $\mu\text{m}$  thickness) of regenerated mammary glands from GFP-aPKCi<sup>+</sup> infected mouse organoids. Scale bar, 500  $\mu\text{m}$ . Zoom1: z-projection of 37 confocal planes (74  $\mu\text{m}$  thickness). Scale bar, 100  $\mu\text{m}$ . Zoom 2&3: z-projection of 10 confocal planes (20  $\mu\text{m}$  thickness) of regenerated mammary glands from GFP-aPKCi<sup>+</sup> infected mouse organoids showing GFP-aPKCi<sup>+</sup> luminal epithelial cells escaping from the mammary ducts and in the stroma. Scale bars, 20  $\mu\text{m}$ .

**Table S1. Medium composition**

| <b>Media</b>                          | <b>Composition</b>                                                                                |
|---------------------------------------|---------------------------------------------------------------------------------------------------|
| Collagenase solution                  | DMEM/F12 + 5% FBS + 12% Trypsin 10X + 25 mg Gentamicin + 2.5 mg human insulin + 50 µg Collagenase |
| DNase solution                        | DMEM/F12 + 1% Glutamine + 1% Penicillin/streptomycin + 4 U/mL of DNase I                          |
| Organoid medium (during purification) | DMEM/F12 + 1% Glutamine + 1% Penicillin/streptomycin                                              |
| Organoid medium (during infection)    | DMEM/F12 + 1% Glutamine + 1% Penicillin/streptomycin + 1% ITS + 2.5 nM FGF                        |
| Transplantation medium                | 50% organoid medium + 50% matrigel + 2.5 nM FGF                                                   |
| Hek293T- lentiX medium                | DMEM High Glucose GlutaMAX + 10% FBS + 1% Penicillin/streptomycin                                 |

**Table S2. Reagents used for this study**

| <b>Organoids purification</b>                                      |                  |                     |
|--------------------------------------------------------------------|------------------|---------------------|
| <b>Reagent</b>                                                     | <b>Reference</b> | <b>Manufacturer</b> |
| ITS ( human insulin, human transferrin, sodium selenite)           | I3146-5ml        | Sigma               |
| Glutamine                                                          | 25030024         | Gibco               |
| Penicillin/Streptomycin                                            | 15140122         | Gibco               |
| Trypsin 10X                                                        | 15400054         | Gibco               |
| DMEM/F12                                                           | 11039-047        | Gibco               |
| Human Insulin                                                      | I9278-5ml        | Sigma               |
| Gentamicin                                                         | 15750-037        | Gibco               |
| HBSS                                                               | 14025-050        | Gibco               |
| Collagenase                                                        | 10103578001      | Sigma               |
| DNase I                                                            | D4263            | Sigma               |
| FGF                                                                | PMG0034          | Thermo Fisher       |
| Corning® Costar® Ultra-Low Attachment Multiple Well Plate 24 wells | CLS3473-24EA     | Sigma               |
| <b>Organoids infection</b>                                         |                  |                     |
| <b>Reagent</b>                                                     | <b>Reference</b> | <b>Manufacturer</b> |
| ViroMag R/L Transduction Reagent                                   | RL40200          | Oz Biosciences      |
| <b>Lentiviral particles preparation</b>                            |                  |                     |
| <b>Product</b>                                                     | <b>Reference</b> | <b>Manufacturer</b> |
| DMEM High Glucose GlutaMax                                         | 61965-059        | Life technologie    |
| Lenti-X 293T Cell line                                             | 632180           | Ozyme               |
| Lenti-X Concentrator                                               | 631231           | Ozyme               |
| GeneJuice® Transfection Reagent                                    | 70967-3          | Merck               |
| <b>Animals care / surgery</b>                                      |                  |                     |
| <b>Reagent</b>                                                     | <b>Reference</b> | <b>Manufacturer</b> |
| Syringe 25 µl Hamilton 702 RN                                      | 74329            | Dutscher            |
| Gemini Cautery Kit                                                 | 72-6067          | Harvard Apparatus   |
| Ketamine                                                           | Imalgen ® 1000   | Merial              |
| Xylazine                                                           | Rompun ® 2%      | Bayer               |
| Rod 16-R 21 Kgy                                                    | Rod16-R          | Genobios            |
| <b>uDISCO clarification</b>                                        |                  |                     |
| <b>Reagent</b>                                                     | <b>Reference</b> | <b>Manufacturer</b> |
| benzyl benzoate                                                    | B6630-500ML      | Sigma               |
| benzyl alcohol                                                     | 24122-1L-D       | Sigma               |
| tert-butanol                                                       | 360538-1L-D      | Sigma               |
| DICHLOROMETHANE, ANHYDROUS, >=99.8%, CO                            | 270997-100ML     | Sigma               |
| Diphenyl ether, 99%                                                | A15791.30        | VWR                 |
| DL-alpha-Tocopherol, 97+%                                          | A17039.18        | VWR                 |

**Table S3. Antibodies references and dilutions used for this study**

| <b>Primary antibodies</b>                      | <b>Species</b> | <b>Dilution</b> | <b>Reference</b>                 | <b>Manufacturer</b>    |
|------------------------------------------------|----------------|-----------------|----------------------------------|------------------------|
| CD29 (clone 9EG7)                              | Rat            | 1/100           | 550531                           | BD Biosciences         |
| E-cadherin (ECCD-2)                            | Rat            | 1/200           | 13-1900                          | Invitrogen             |
| GFP                                            | Chicken        | 1/200           | ab13970                          | Abcam                  |
| keratin 5                                      | Rabbit         | 1/200           | BLE905501                        | Ozyme                  |
| keratin 8                                      | Rat            | 1/200           | TROMA-I                          | DSHB                   |
| keratin 14                                     | Rabbit         | 1/200           | BLE905301                        | Ozyme                  |
| laminin 5                                      | Rabbit         | 1/2000          | Gift from M. Aumeilley (Cologne) |                        |
| Phospho-Myosin Light Chain 2 (Ser19)           | Rabbit         | 1/50            | 3671S                            | Ozyme                  |
| MT1-MMP                                        | Rabbit         | 1/100           | ab51074                          | Abcam                  |
| rab7 (clone D95F2)                             | Rabbit         | 1/75            | 9367                             | Cell Signaling Tech    |
| Smooth Muscle Actin                            | Mouse          | 1/100           | M0851                            | Dako                   |
| ZO-1 clone R40.76                              | Rat            | 1/100           | MABT11                           | Millipore              |
| <b>Secondary antibodies</b>                    |                | <b>Dilution</b> | <b>Reference</b>                 | <b>Manufacturer</b>    |
| IgG-chicken 488                                | Goat           | 1/200           | A11039                           | Life Technologies      |
| IgG-rabbit Cy3                                 | Donkey         | 1/200           | 711-165-152                      | Jackson Immunoresearch |
| IgG-rabbit Alexa 647                           | Donkey         | 1/200           | A31573                           | Invitrogen             |
| IgG-rat Alexa Fluor 647                        | Goat           | 1/200           | A21247                           | Molecular Probes       |
| <b>Tested primary antibodies - not working</b> |                | <b>Dilution</b> | <b>Reference</b>                 | <b>Manufacturer</b>    |
| Type I collagen                                | Mouse          | 1/200           | C2456                            | Sigma                  |
| Type IV collagen                               | Rabbit         | 1/200           | ab19808                          | Abcam                  |
| GM130                                          | Mouse          | 1/100           | 610823                           | BD Biosciences         |
| aPKCi                                          | Mouse          | 1/100           | 610175                           | BD Biosciences         |

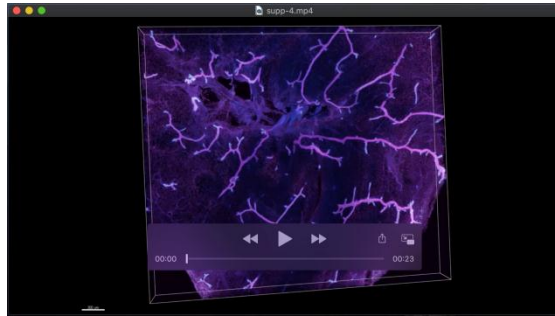

**Movie 1. 3D reconstruction of FVB mouse mammary gland 4** performed on Imaris software. The movie corresponds to the z-stack shown in Fig. 1d of 145 confocal planes (290  $\mu\text{m}$  thickness) of cleared mouse gland 4 showing the localization of laminin 5 (in magenta) and keratin 8 (in cyan). Z-stack images were captured at 2  $\mu\text{m}$  interval.

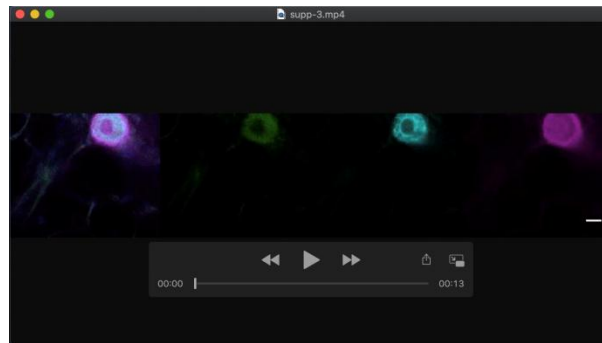

**Movie 2. Detection of GFP-aPKC<sup>i</sup> luminal epithelial cells breaching the basement membrane and disseminating into the surrounding stroma.** The movie corresponds to the z-stack shown in Fig. 3b – zoom 2 showing the localization of laminin5 (in magenta) and keratin8 (in cyan). Z-stack images were captured at 2  $\mu\text{m}$  interval.

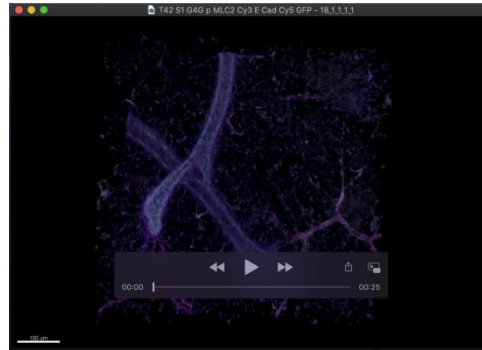

**Movie 3. Detection of GFP<sup>+</sup> luminal epithelial cells of regenerated mammary glands from GFP<sup>+</sup> infected mouse organoids:** 3D reconstruction performed on Imaris software corresponding to the figure 3c of 152 confocal planes (304  $\mu\text{m}$  thickness). Z-stack images were captured at 2  $\mu\text{m}$  interval.

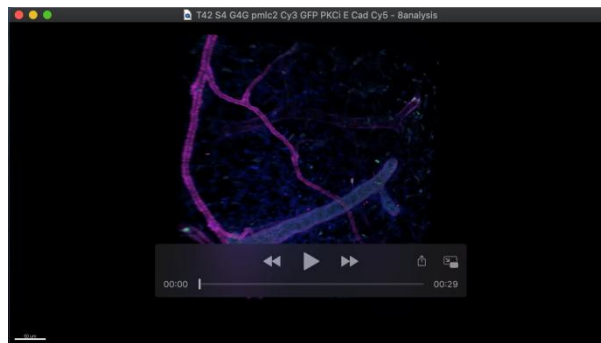

**Movie 4. Detection of GFP-aPKCi<sup>+</sup> luminal epithelial cells of regenerated mammary glands from GFP-aPKCi<sup>+</sup> infected mouse organoids:** 3D reconstruction performed on Imaris software corresponding to the figure 3d of 176 confocal planes (352  $\mu\text{m}$  thickness). Z-stack images were captured at 2  $\mu\text{m}$  interval.
